# Supplementary material for: First biocatalytic synthesis of piperidine derivatives via an immobilized lipase-catalyzed multicomponent reaction
Source: Royal Society of Chemistry journal article supplement (doi:10.1039/d1nj06232h), 2022-01-01
Supplement: d1nj06232h1.pdf [file d1nj06232h1.pdf]

## Supporting information (New Journal of Chemistry)

### First biocatalytic synthesis of piperidine derivatives via immobilized lipase catalyzed multicomponent reaction

Meenakshi Budhiraja, Amjad Ali and Vikas Tyagi\*

School of Chemistry and Biochemistry, Thapar Institute of Engineering and Technology,  
Patiala-147004, Punjab, India

E-mail: [vikas.tyagi@thapar.edu](mailto:vikas.tyagi@thapar.edu)

#### Table of Contents:

##### General procedures

|                                                        |        |
|--------------------------------------------------------|--------|
| Reaction scale-up and reusability procedure.....       | S2     |
| Procedure for enzyme concentration estimation .....    | S2-S3  |
| Activity assay of CALB@MHNTs for natural reaction..... | S3     |
| Characterization data of synthesized compounds.....    | S4-S6  |
| Copy of <sup>1</sup> H NMR Spectra .....               | S7-S16 |
| References.....                                        | S16    |

**Reaction scale-up and catalyst reusability procedure:** A mixture of ethyl acetoacetate (3a) (1.0 g, 1.0 equiv.), aromatic aniline (2a) (1.401g, 0.01536mmol, 2.0 equiv.), CALB@MHNTs (1.0 g), and ethanol (15 mL) as a solvent were stirred for 20 minutes in a round bottom flask at 55°C. Then benzaldehyde (1a) (1.56g, 0.01536 mmol, 2.0 equiv) was added to the reaction mixture and stirred for overnight. Upon completion of the reaction, the catalyst was separated from the reaction mixture using an external magnet and the product mixture was decanted off. The solid product obtained was then washed with ~20 mL EtOH (3-4 times) to further purify the product. The separated catalyst was reused in next catalytic cycle using the aforementioned protocol.

**Procedure to find enzyme loading over functionalized magnetic support:** The amount of lipase adsorbed on magnetic support was estimated using Bradford assay using BSA as standard.<sup>[1]</sup>

$$q = \frac{(C_i - C_f)V}{W} \left(\frac{mg}{g}\right)$$

Where q = amount of protein loaded over magnetic support (mg/g), C<sub>i</sub> = initial concentration of protein in original solution before immobilization (mg/ml), C<sub>f</sub> = final concentration of protein in supernatant after immobilization (mg/ml), V= volume of buffer added during immobilization (ml), W = weight of magnetic support (g). All the readings are recorded in triplicate and then averaged to find the amount of protein load on magnetic support.

## Characterization of compounds:

| S.No. | Derivatives                                                                                                                                                                                                          | <sup>1</sup> H NMR Spectra                                                                                                                                                                                                                                                                                                                                                  | Ref. |
|-------|----------------------------------------------------------------------------------------------------------------------------------------------------------------------------------------------------------------------|-----------------------------------------------------------------------------------------------------------------------------------------------------------------------------------------------------------------------------------------------------------------------------------------------------------------------------------------------------------------------------|------|
| 1.    | 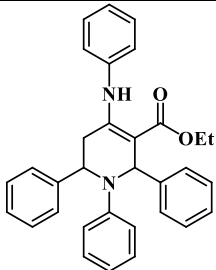 <p>(4a) Ethyl 1,2,6-triphenyl-4-(phenylamino)-1,2,5,6-tetrahydropyridine-3-carboxylate</p>                                         | Yield= 90%, <sup>1</sup> H NMR (400 MHz, CDCl <sub>3</sub> ) δ: 1.47 (t, <i>J</i> =7.1, 3H), 2.76 (d, <i>J</i> =16.0, 1H), 2.87 (dd, <i>J</i> =16.0, 4.0, 1H), 4.31–4.35 (q, 1H), 4.44 – 4.49 (q, 1H), 5.15 (br s, 1H), 6.28 (d, <i>J</i> =8.0, 2H), 6.46 (s, 1H), 6.52 (d, <i>J</i> =8.0, 2H), 6.59–6.63 (m, 1H), 7.05 –7.10 (m, 5H), 7.09-7.35 (m, 10H) 10.29 (br s, 1H). | [2]  |
| 2.    |  <p>(4b) Methyl-1,2,6-triphenyl-4-(phenylamino)-1,2,5,6-tetrahydropyridine-3-carboxylate</p>                                       | Yield = 84%, <sup>1</sup> H NMR (500 MHz, CDCl <sub>3</sub> ) δ: 2.74-2.79 (d, <i>J</i> =15 Hz, 1H), 2.84-2.89 (dd, <i>J</i> =15, 6 Hz, 1H), 3.93 (s, 3H), 5.14 (br s, 1H), 6.28 (d, <i>J</i> =7.6 Hz, 2H), 6.44 (s, 1H), 6.51-6.53 (d, <i>J</i> = 8.0 Hz, 2H), 6.59-6.61 (t, <i>J</i> =7.0 Hz, 1H), 7.04-7.31(m, 15H), 10.25 (s, 1H).                                      | [2]  |
| 3.    |  <p>(4c) Methyl-1-(4-bromophenyl)-4-((4-bromophenyl) amino)-2,6-bis(4-methoxyphenyl)-1,2,5,6-tetrahydropyridine-3-carboxylate</p> | Yield= 80 %, <sup>1</sup> H NMR (500 MHz, CDCl <sub>3</sub> ) δ: 2.69 (d, <i>J</i> =12.4, 1H), 2.83 (dd, <i>J</i> =13.0, 6.4, 1H), 3.78, 3.91, 3.92 (3s, 9H), 5.02 (br s, 1H), 6.19 (d, <i>J</i> =8.5, 2H), 6.27 (s, 1H) 6.37 (d, <i>J</i> =9 Hz, 2H), 6.80-6.82 (m, 4H) 7.03(d, <i>J</i> =8.5, 2H), 7.11-7.22 (m, 4H), 7.23 (m, 2H), 10.19 (br s, 1H).                     | [3]  |

|    |                                                                                                                                                                                                                            |                                                                                                                                                                                                                                                                                                                                                                                                                           |     |
|----|----------------------------------------------------------------------------------------------------------------------------------------------------------------------------------------------------------------------------|---------------------------------------------------------------------------------------------------------------------------------------------------------------------------------------------------------------------------------------------------------------------------------------------------------------------------------------------------------------------------------------------------------------------------|-----|
| 4. | 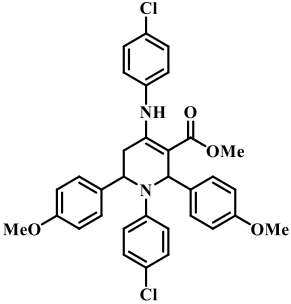 <p><b>(4d) Methyl-1-(4-chlorophenyl)-4-((4-chlorophenyl)amino)-2,6-bis(4-methoxyphenyl)-1,2,5,6-tetrahydropyridine-3-carboxylate</b></p> | Yield= 79%, <sup>1</sup> H NMR (500 MHz, CDCl <sub>3</sub> ): δ 2.68-2.71 (m, 1H), 2.81-2.84 (m, 1H), 3.78 (s, 6H), 3.92 (s, 3H), 5.03 (br s, 1H), 6.20-6.38 (m, 5H), 6.80-6.81 (m, 3H), 7.12-7.26 (m, 9H), 10.20 (s, 1H).                                                                                                                                                                                                | [3] |
| 5. |  <p><b>(4e) Ethyl-1-(4-methoxyphenyl)-4-((4-methoxyphenyl)amino)-2,6-diphenyl-1,2,5,6-tetrahydropyridine-3-carboxylate</b></p>            | Yield= 65%, <sup>1</sup> H NMR (500 MHz, CDCl <sub>3</sub> ): δ: 1.40–1.43 (t, <i>J</i> = 7.5 Hz, 3H), 2.62 (dd, <i>J</i> = 15.0, 2.5 Hz, 1H), 2.76 (dd, <i>J</i> = 15.5, 5.5 Hz, 1H), 3.65 (s, 3H), 3.73 (s, 3H), 4.25–4.32 (m, 1H), 4.37–4.42 (m, 1H), 5.03 (br s, 1H), 6.23–6.24 (d, <i>J</i> = 8.5 Hz, 2H), 6.32 (s, 1H), 6.45–6.46 (d, <i>J</i> = 8.5 Hz, 2H), 6.60–6.65 (m, 4H), 7.16–7.31 (m, 10H), 10.14 (s, 1H). | [4] |
| 6. |  <p><b>(4f) Methyl-2,6-bis(4-bromophenyl)-1-phenyl-4-(phenylamino)-1,2,5,6-tetrahydropyridine-3-carboxylate</b></p>                     | Yield= 82%, <sup>1</sup> H NMR (500 MHz, CDCl <sub>3</sub> ) δ: 2.73 (dd, <i>J</i> =15.0, 2.5, 1H), 2.81 (dd, <i>J</i> =15.0, 5.5, 1H), 3.91 (s, 3H), 5.06 (br s, 1H), 6.32 (s, 1H), 6.40 (d, <i>J</i> =7.0, 1H), 6.45 (d, <i>J</i> =8.5, 2H), 6.64 (t, <i>J</i> =7.3, 1H), 7.0 (d, <i>J</i> =8.5 Hz, 2H), 7.05-7.17 (m, 7H), 7.37-7.39 (m, 4H), 10.23 (s, 1H).                                                           | [5] |
| 7. |  <p><b>(4g) Methyl-2,6-bis(4-chlorophenyl)-1-phenyl-4-(phenylamino)-1,2,5,6-tetrahydropyridine-3-carboxylate</b></p>                    | Yield= 76%, <sup>1</sup> H NMR (500 MHz, CDCl <sub>3</sub> ) δ: 2.74 (dd, <i>J</i> =15.0, 2.5, 1H), 2.82 (dd, <i>J</i> =15.0, 5.5, 1H), 3.91 (s, 3H), 5.07 (br s, 1H), 6.32 (s, 1H), 6.41 (d, <i>J</i> =7.0, 2H), 6.45 (d, <i>J</i> =8.5, 2H), 6.65 (t, <i>J</i> =7.3, 1H), 6.99 (d, <i>J</i> = 8.5 Hz, 2H), 7.06-7.18 (m, 7H), 7.37-7.40 (m, 4H), 10.23 (s, 1H).                                                         | [6] |

|     |                                                                                                                                                                                                                  |                                                                                                                                                                                                                                                                                                                                                                                                                                                 |     |
|-----|------------------------------------------------------------------------------------------------------------------------------------------------------------------------------------------------------------------|-------------------------------------------------------------------------------------------------------------------------------------------------------------------------------------------------------------------------------------------------------------------------------------------------------------------------------------------------------------------------------------------------------------------------------------------------|-----|
| 8.  | 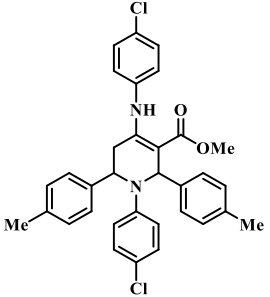 <p><b>(4h) Methyl-1-(4-chlorophenyl)-4-((4-chlorophenyl)amino)-2,6-di-p-tolyl-1,2,5,6-tetrahydropyridine-3-carboxylate</b></p> | Yield= 78%, <sup>1</sup> H NMR (500 MHz, CDCl <sub>3</sub> ) δ: 2.31 (s, 3H), 2.34 (s, 3H), 2.66-2.70 (m, 1H), 2.81-2.86 (m, 1H), 3.92 (s, 3H), 5.05 (br s, 1H), 6.19 (d, <i>J</i> = 10.5 Hz, 2H), 6.31 (s, 1H), 6.40 (d, <i>J</i> = 11.0 Hz, 2H), 6.60 (d, <i>J</i> =8.5,1H) 7.01-7.14 (m, 12H), 10.18 (s, 1H).                                                                                                                                | [5] |
| 9.  |  <p><b>(4i) Methyl-1-(4-bromophenyl)-4-((4-bromophenyl) amino)-2,6-di-p-tolyl-1,2,5,6-tetrahydropyridine-3-carboxylate</b></p>  | Yield = 71%, H <sup>1</sup> NMR (500 MHz, CDCl <sub>3</sub> ) δ: 2.32 (s, 3H), 2.34 (s, 3H), 2.64 (d, <i>J</i> =17.5, 1H), 2.84 (dd, <i>J</i> =19.0, 7.5, 1H), 3.93 (s, 3H), 5.06 (d, <i>J</i> =6.5, 1H), 6.12 (d, <i>J</i> = 10.0, 2H), 6.31 (s, 1H), 6.38 (d, <i>J</i> =11.0, 2H), 7.02 (d, <i>J</i> =10.0, 2H), 7.09(d, <i>J</i> =9.0,2H), 7.14 (d, <i>J</i> =15.0, 2H), 7.20 (d, <i>J</i> =10.5, 2H), 7.26 (s, 2H), 10.19 (s, 1H).          | [6] |
| 10. |  <p><b>(4k) Ethyl-1-(4-chlorophenyl)-4-((4-chlorophenyl)amino)-2,6-diphenyl-1,2,5,6-tetrahydropyridine-3-carboxylate</b></p>  | Yield = 82%, <sup>1</sup> H NMR (500 MHz, CDCl <sub>3</sub> ) δ:1.47 (t, <i>J</i> = 7.0 Hz, 3H), 2.70 (dd, <i>J</i> = 15.5, 2.0 Hz, 1H), 2.85 (dd, <i>J</i> = 15.0, 6.0 Hz, 1H), 4.31–4.35 (dq, <i>J</i> = 7.1,3.7 Hz, 2H), 5.11 (br s, 1H), 6.1 (d, <i>J</i> = 7.0, 2H), 6.38 (s, 1H), 6.42 (d, <i>J</i> =9.0, 2H) 6.96 (d, <i>J</i> =9.5, 2H) 7.04 (d, <i>J</i> =7.0, 2H), 7.14 (d, <i>J</i> = 6.0, 2H), 7.22-7.29 (m, 8H), 10.29 (br s, 1H). | [3] |

# Copy of 1H-NMR Spectra of polyfunctionalized piperidines.

(4a) Ethyl-1,2,6-triphenyl-4-(phenylamino)-1,2,5,6-tetrahydropyridine-3-carboxylate

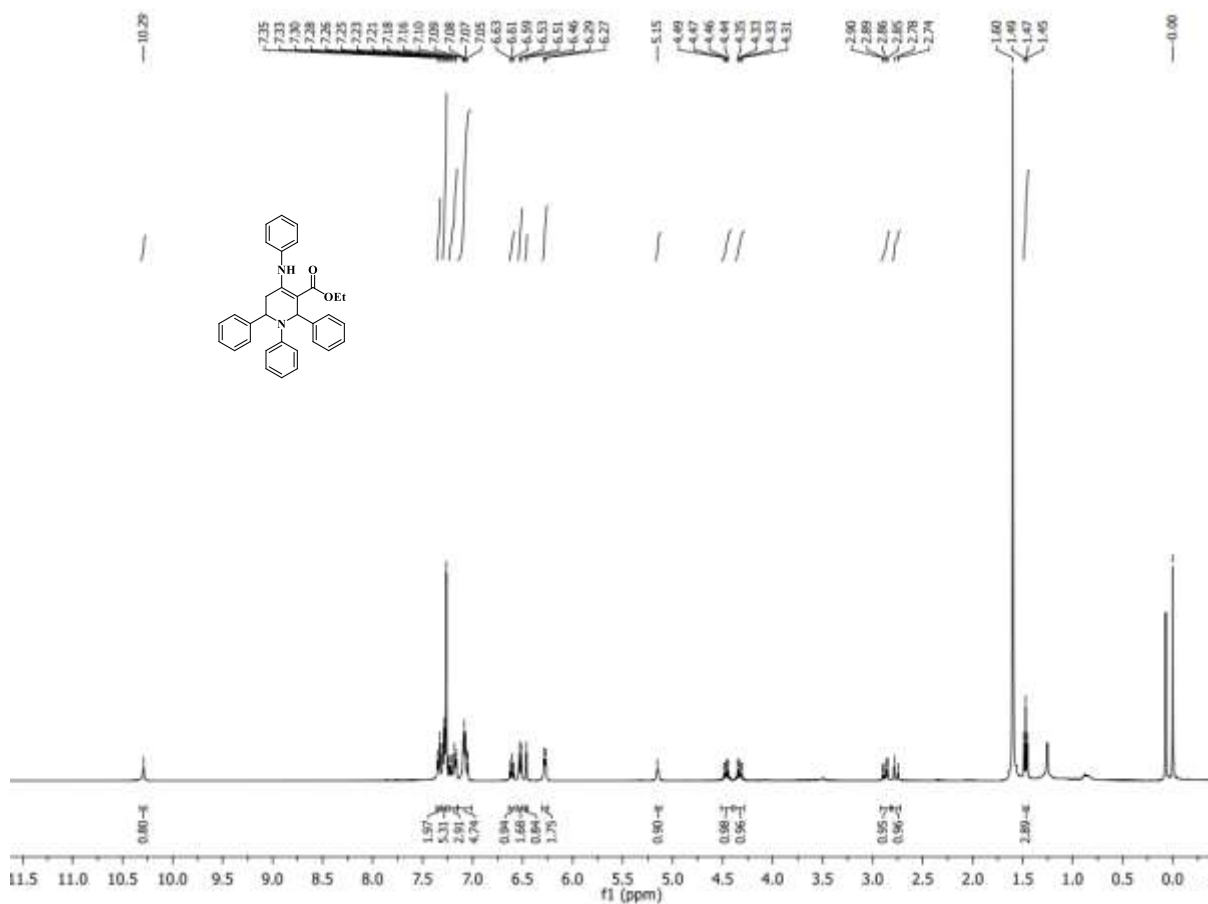



(4c) Methyl-1-(4-bromophenyl)-4-((4-bromophenyl) amino)-2,6-bis(4-methoxyphenyl)-1,2,5,6-tetrahydropyridine-3-carboxylate

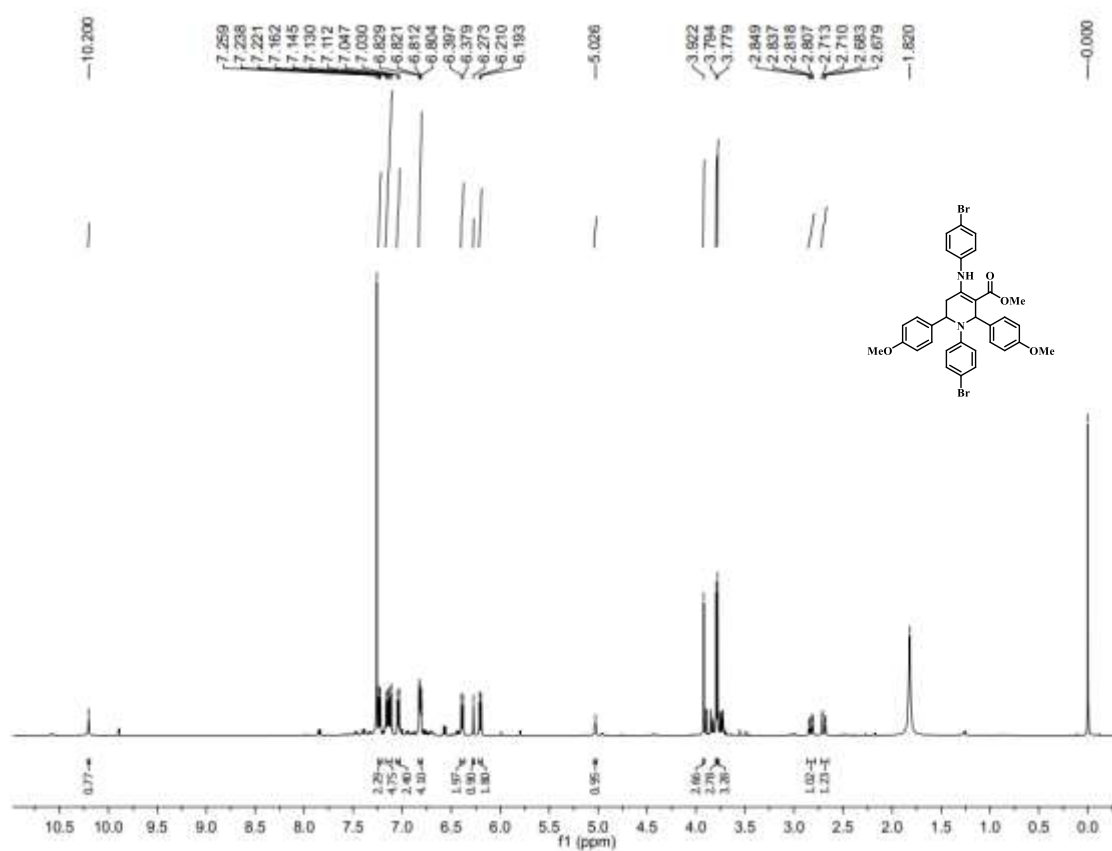

(4d) Methyl-1-(4-chlorophenyl)-4-((4-chlorophenyl) amino)-2,6-bis(4-methoxyphenyl)-1,2,5,6-tetrahydropyridine-3-carboxylate



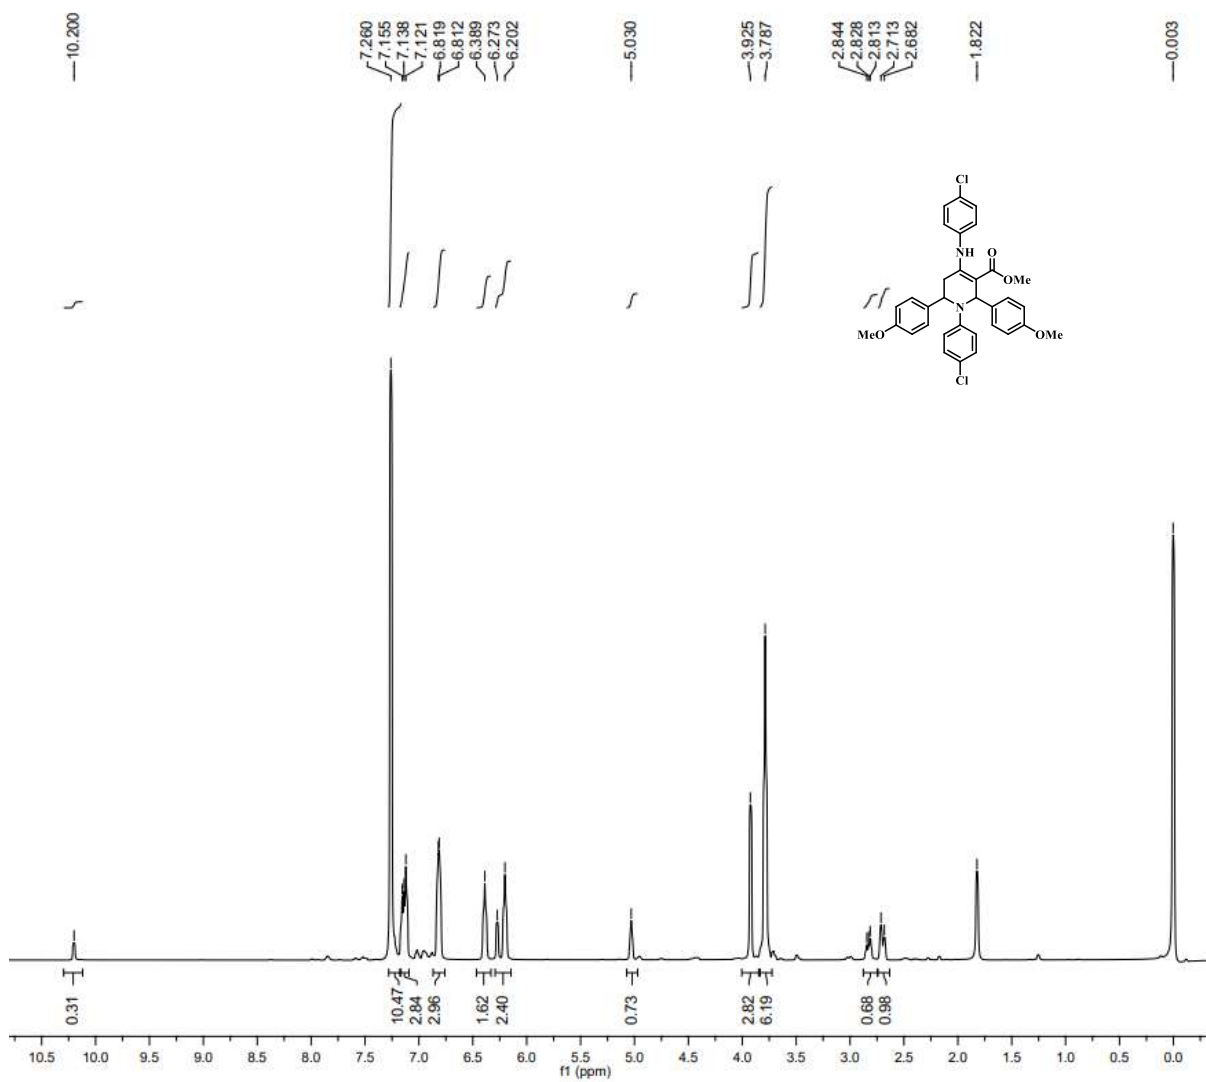

(4e) Ethyl-1-(4-methoxyphenyl)-4-((4-methoxyphenyl)amino)-2,6-diphenyl-1,2,5,6-tetrahydropyridine-3-carboxylate

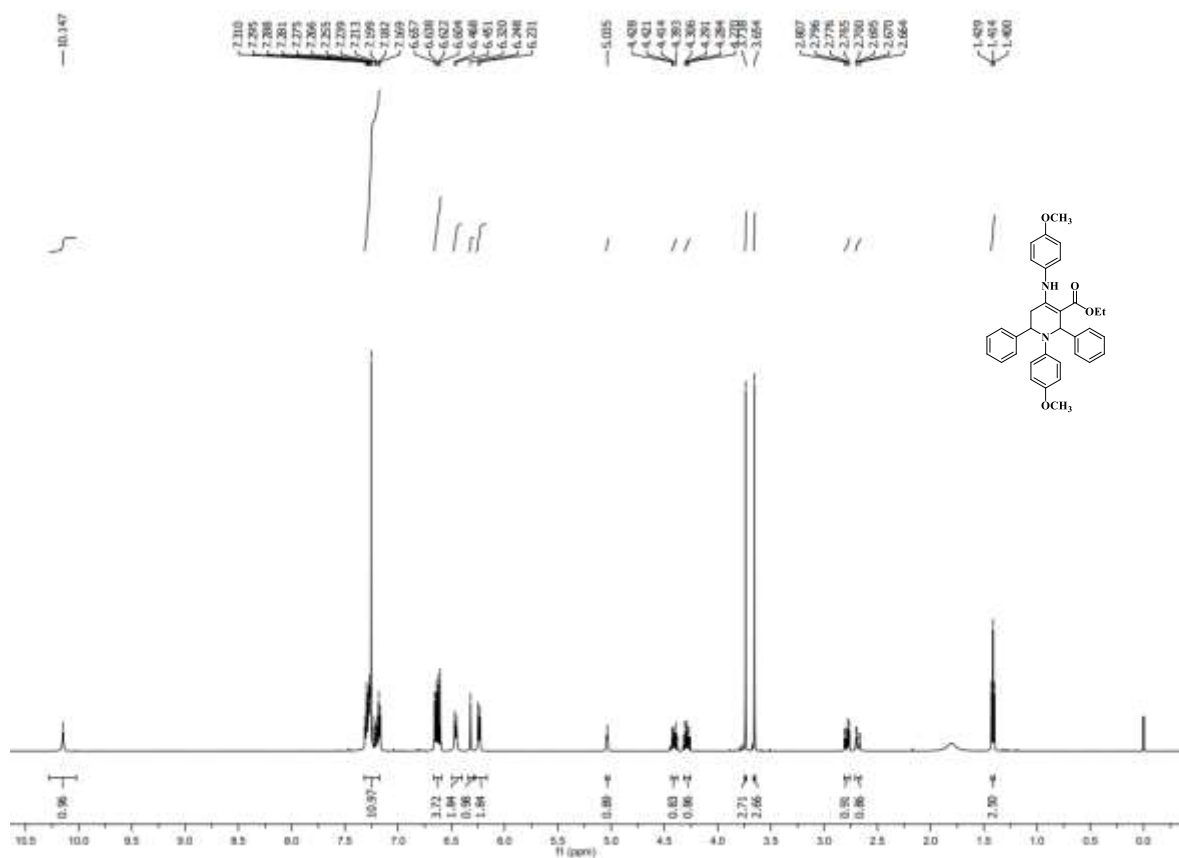

(4f) Methyl-2,6-bis(4-bromophenyl)-1-phenyl-4-(phenylamino)-1,2,5,6-tetrahydropyridine-3-carboxylate

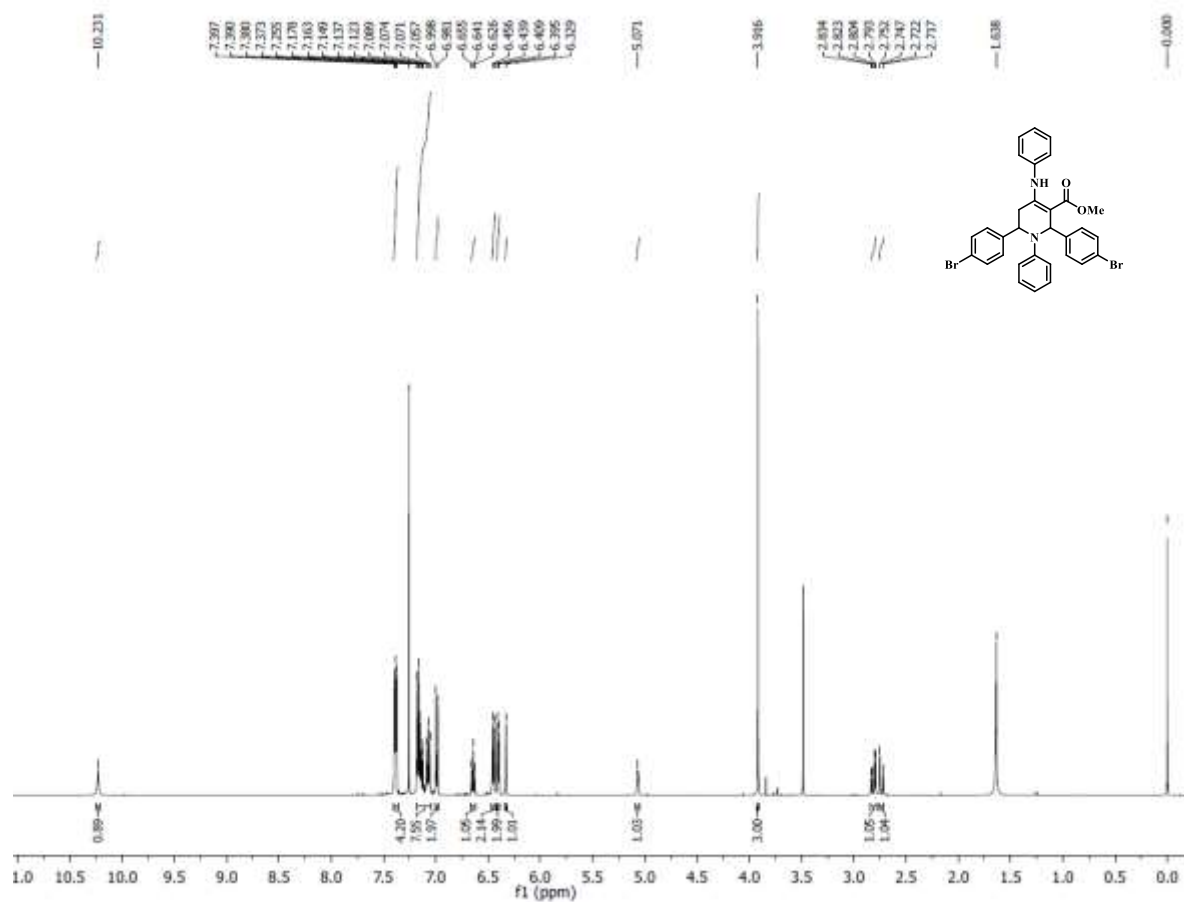

(4g) Methyl-2,6-bis(4-chlorophenyl)-1-phenyl-4-(phenylamino)-1,2,5,6-tetrahydropyridine-3-carboxylate

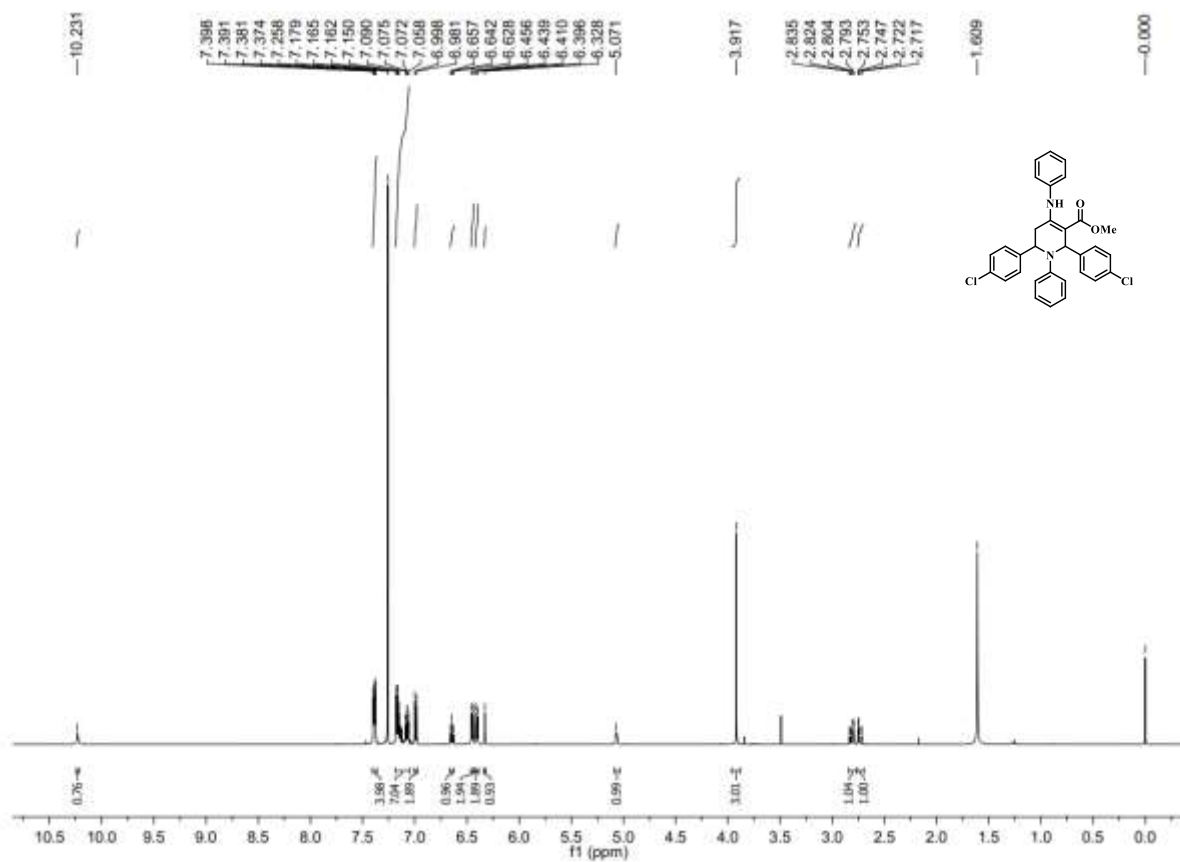

(4h) Methyl-1-(4-chlorophenyl)-4-((4-chlorophenyl)amino)-2,6-di-p-tolyl-1,2,5,6-tetrahydropyridine-3-carboxylate

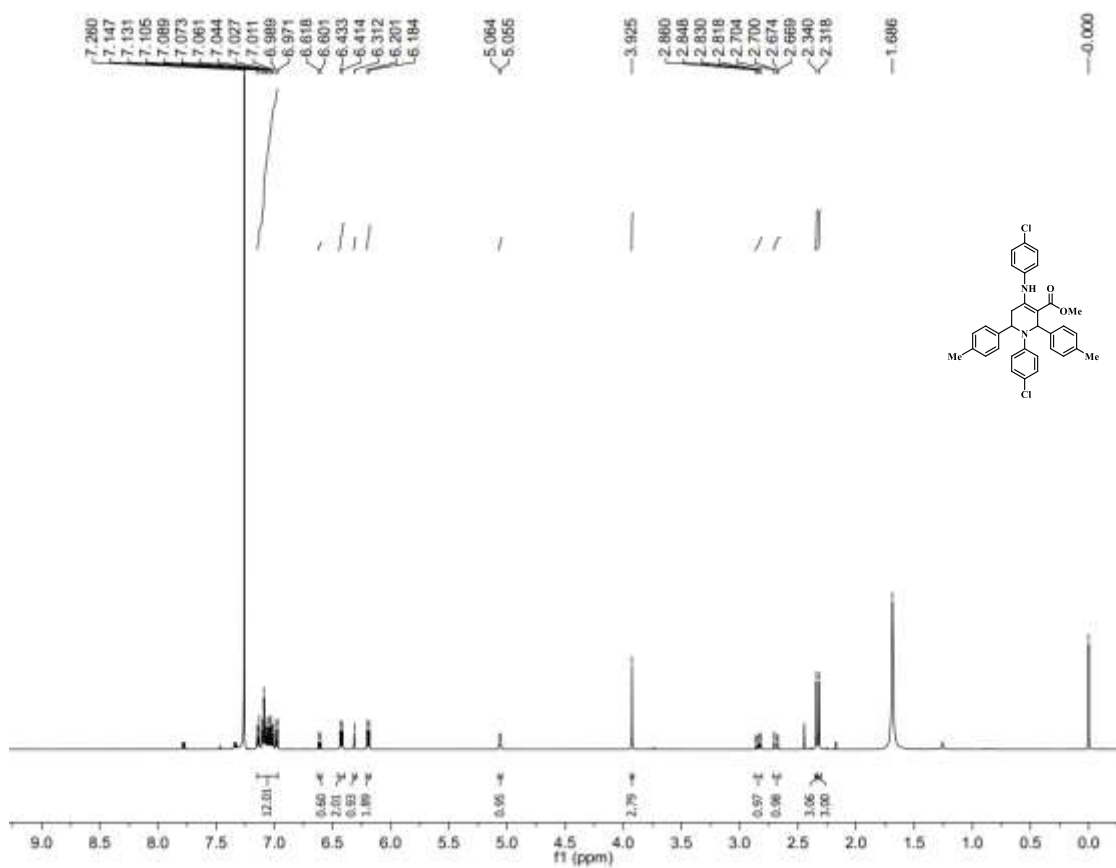

(4i) Methyl-1-(4-bromophenyl)-4-((4-bromophenyl) amino)-2,6-di-p-tolyl-1,2,5,6-tetrahydropyridine-3-carboxylate

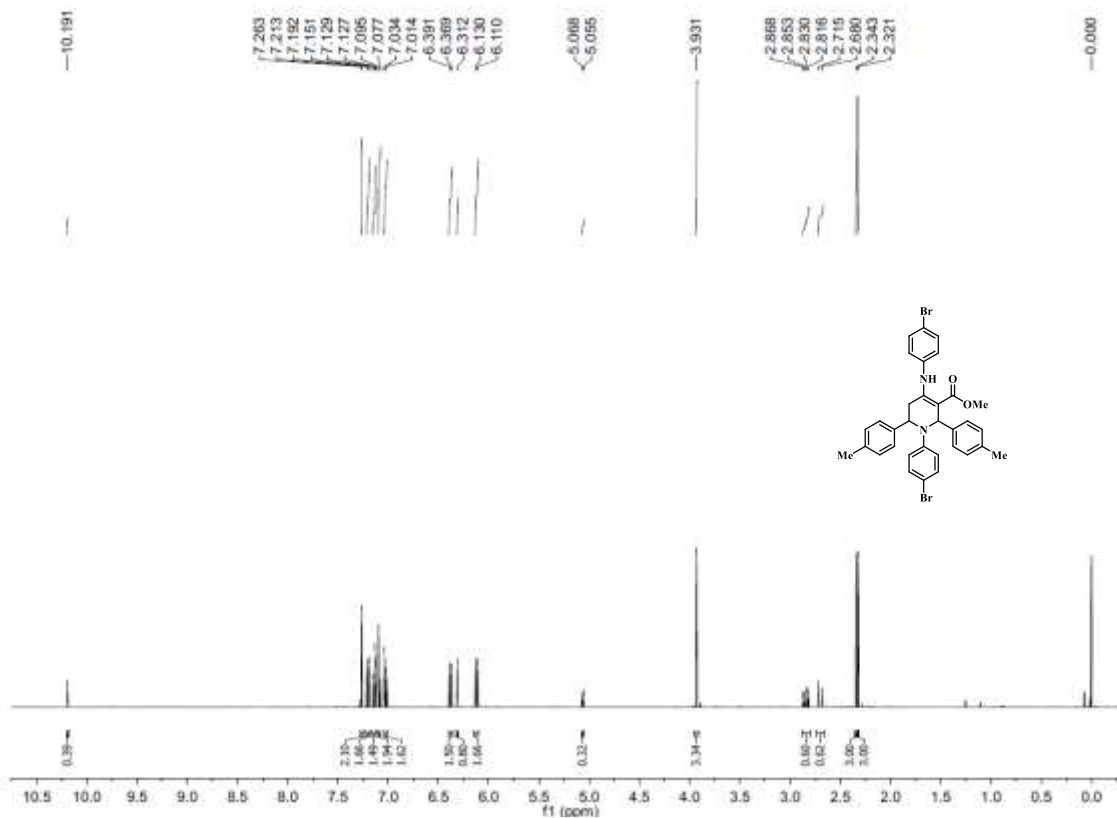

(4k) Ethyl-1-(4-chlorophenyl)-4-((4-chlorophenyl)amino)-2,6-diphenyl-1,2,5,6-tetrahydropyridine-3-carboxylate

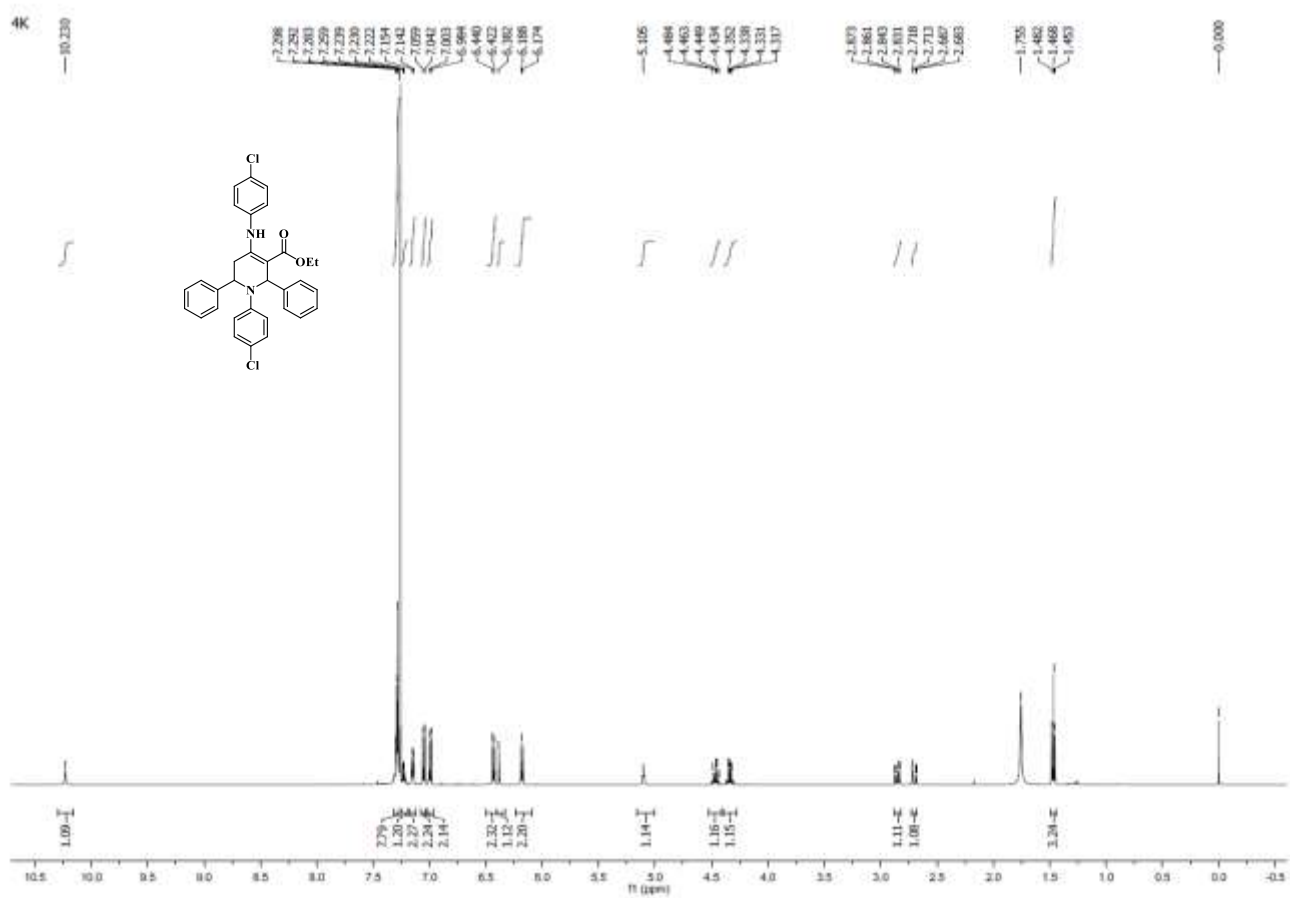

## References

- [1] a) M. M. Bradford Analytical biochemistry, **1976**, 76, 248-254; b) R. Baharfar, S. Mohajer, Catal. Letters **2016**, 146, 1729-1742.
- [2] S. T. Fardood, A. Ramazani, **2018**, 12, 92-102.
- [3] F. Mohamadpour, Polycycl. Aromat. Compd. **2020**, 40, 681-692.
- [4] M. Misra, S. K. Pandey, V. P. Pandey, J. Pandey, R. Tripathi, R. P. Tripathi, Bioorganic Med. Chem. **2009**, 17, 625-633.
- [5] B. Umamahesh, V. Sathesh, G. Ramachandran, M. Sathishkumar, K. Sathiyarayanan, Catal. Letters **2012**, 142, 895-900.
- [6] A. T. Khan, T. Parvin, L. H. Choudhury, J. Org. Chem. **2008**, 73, 8398-8402.
